# Supplementary material for: How Is Working Memory Related to Reading Comprehension in Italian Monolingual and Bilingual Children?
Source: MDPI journal article supplement (doi:10.3390/brainsci13010058), 2022-12-28
Supplement: s1 [file s1]

**Table S1.** Results of multiple regression analysis using Working Memory Index (WMI) as predictor (Model 1).

|                                                       | <i>Estimates</i> |
|-------------------------------------------------------|------------------|
| <b>Direct effects</b>                                 |                  |
| WMI → Listening comprehension                         | 0.17             |
| WMI → Text reading accuracy                           | 0.28*            |
| WMI → Reading comprehension                           | 0.19             |
| <b>Moderator effects</b>                              |                  |
| Linguistic status → Listening comprehension           | -0.23            |
| Linguistic status → Text reading accuracy             | -0.20            |
| <b>Moderating effects</b>                             |                  |
| WMI × Linguistic status → Listening comprehension     | 0.07             |
| WMI × Linguistic status → Text reading accuracy       | -0.16            |
| <b>Conditional direct effects</b>                     |                  |
| WMI → Listening comprehension                         |                  |
| Linguistic status 0 (monolingual)                     | 0.17             |
| Linguistic status 1 (bilingual)                       | 0.24             |
| WMI → Text reading accuracy                           |                  |
| Linguistic status 0 (monolingual)                     | 0.28*            |
| Linguistic status 1 (bilingual)                       | 0.12             |
| <b>Mediators effects</b>                              |                  |
| Listening comprehension → Reading comprehension       | 0.22*            |
| Text reading accuracy → Reading comprehension         | 0.21*            |
| <b>Conditional indirect effects</b>                   |                  |
| WMI → Listening comprehension → Reading comprehension |                  |
| Linguistic status 0 (monolingual)                     | 0.04             |
| Linguistic status 1 (bilingual)                       | 0.05             |
| WMI → Text reading accuracy → Reading comprehension   |                  |
| Linguistic status 0 (monolingual)                     | 0.06*            |
| Linguistic status 1 (bilingual)                       | 0.03             |
| <b>Covariate effects</b>                              |                  |
| Parents' years of education → Listening comprehension | 0.19             |
| Parents' years of education → Text reading accuracy   | 0.12             |
| Parents' years of education → Reading comprehension   | 0.10             |

**Notes.** \*  $p < .05$ ; \*\*  $p < .01$ . The analyses have been performed by employing Model 7 of the SPSS macro PROCESS (Hayes, 2013). The model included WMI as predictor (X), listening comprehension and text reading accuracy as mediators (M), reading comprehension as criterion (Y), linguistic status (0 = monolingual, 1 = bilingual) as moderator (W) of the relationship between X and M's, and parents' years of education as a covariate.

**Table S2.** Results of multiple regression analysis using Immediate Narrative Memory (INM) as predictor (Model 2).

|                                                   | <i>Estimates</i> |
|---------------------------------------------------|------------------|
| <b>Direct effects</b>                             |                  |
| INM → Listening comprehension                     | 0.51**           |
| INM → Text reading accuracy                       | 0.18             |
| INM → Reading comprehension                       | 0.09             |
| <b>Moderator effects</b>                          |                  |
| Linguistic status → Listening comprehension       | -0.24            |
| Linguistic status → Text reading accuracy         | -0.24            |
| <b>Moderating effects</b>                         |                  |
| INM × Linguistic status → Listening comprehension | -0.38*           |
| INM × Linguistic status → Text reading accuracy   | -0.02            |
| <b>Conditional direct effects</b>                 |                  |
| INM → Listening comprehension                     |                  |
| Linguistic status 0 (monolingual)                 | 0.51**           |
| Linguistic status 1 (bilingual)                   | 0.13             |
| INM → Text reading accuracy                       |                  |
| Linguistic status 0 (monolingual)                 | 0.18             |
| Linguistic status 1 (bilingual)                   | 0.16             |
| <b>Mediators effects</b>                          |                  |

|                                                       |       |
|-------------------------------------------------------|-------|
| Listening comprehension → Reading comprehension       | 0.23* |
| Text reading accuracy → Reading comprehension         | 0.24* |
| <b><i>Conditional indirect effects</i></b>            |       |
| INM → Listening comprehension → Reading comprehension |       |
| Linguistic status 0 (monolingual)                     | 0.12* |
| Linguistic status 1 (bilingual)                       | 0.03  |
| INM → Text reading accuracy → Reading comprehension   |       |
| Linguistic status 0 (monolingual)                     | 0.04  |
| Linguistic status 1 (bilingual)                       | 0.04  |
| <b><i>Covariate effects</i></b>                       |       |
| Parents' years of education → Listening comprehension | 0.14  |
| Parents' years of education → Text reading accuracy   | 0.13  |
| Parents' years of education → Reading comprehension   | 0.11  |

**Notes.** \*  $p < .05$ ; \*\*  $p < .01$ . The analyses have been performed by employing Model 7 of the SPSS macro PROCESS (Hayes, 2013). The model included INM as predictor (X), listening comprehension and text reading accuracy as mediators (M), reading comprehension as criterion (Y), linguistic status (0 = monolingual, 1 = bilingual) as moderator (W) of the relationship between X and M's, and parents' years of education as a covariate
